# Supplementary figures and images for: Reactant conversion–intercalation strategy toward interlayer-expanded MoS2 microflowers with superior supercapacitor performance
Source: Royal Society of Chemistry journal article supplement (doi:10.1039/d3dt00289f), 2023-01-01

Thiourea

PTH

Pristine MoS<sub>2</sub>

MoS<sub>2</sub>-10

MoS<sub>2</sub>-10-H<sub>2</sub>SO<sub>4</sub>

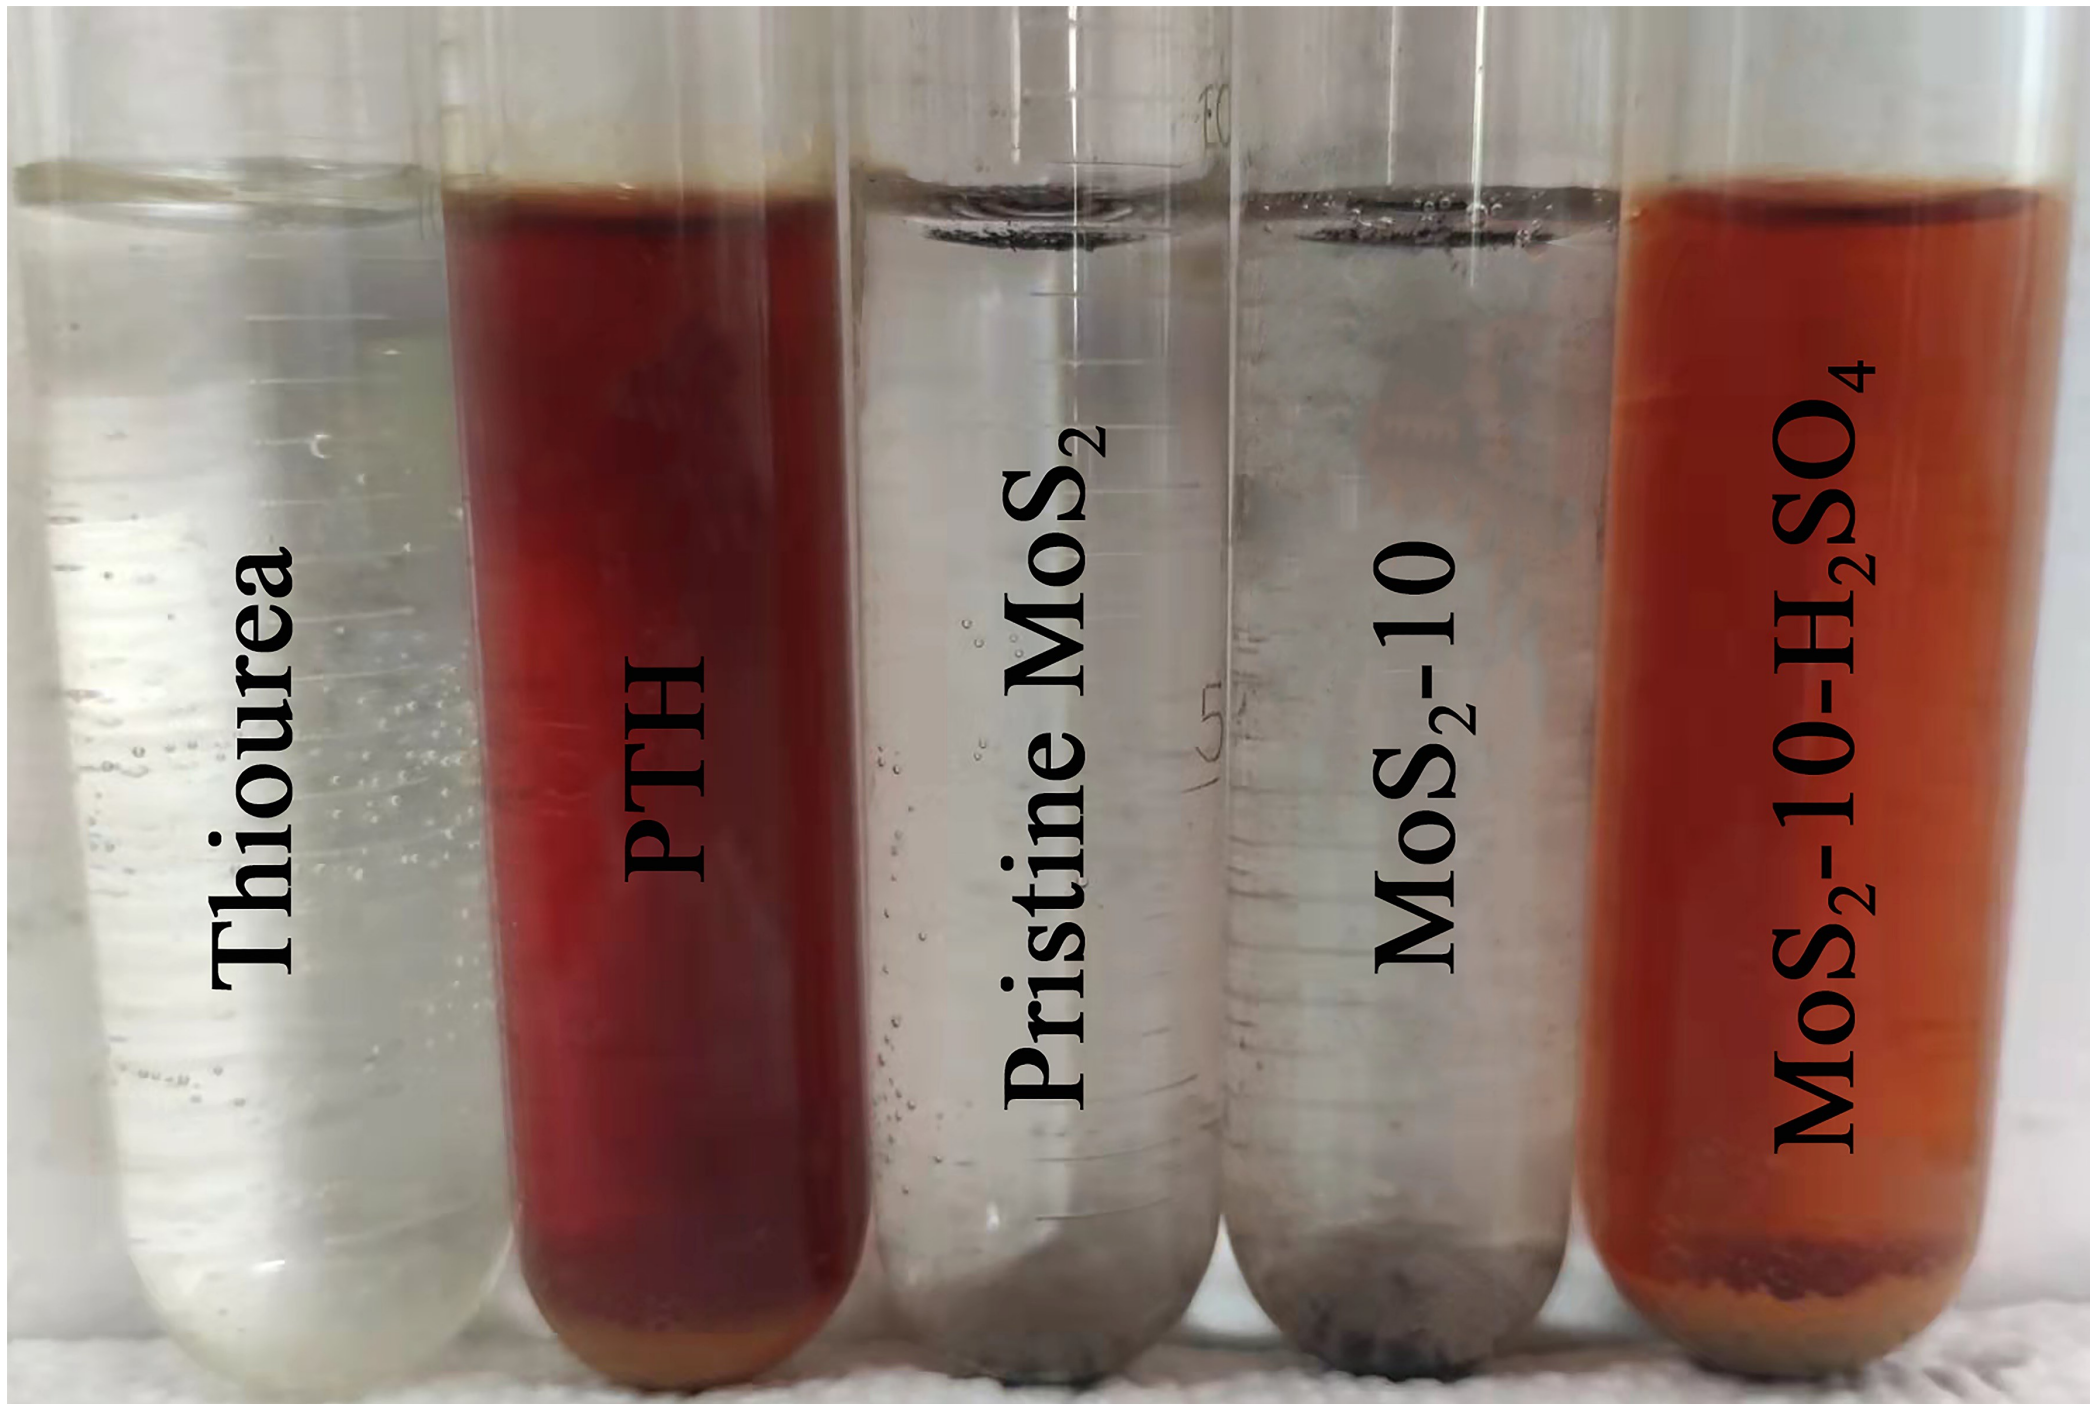

Supplement: d3dt00289f2.pdf [file d3dt00289f2.pdf]

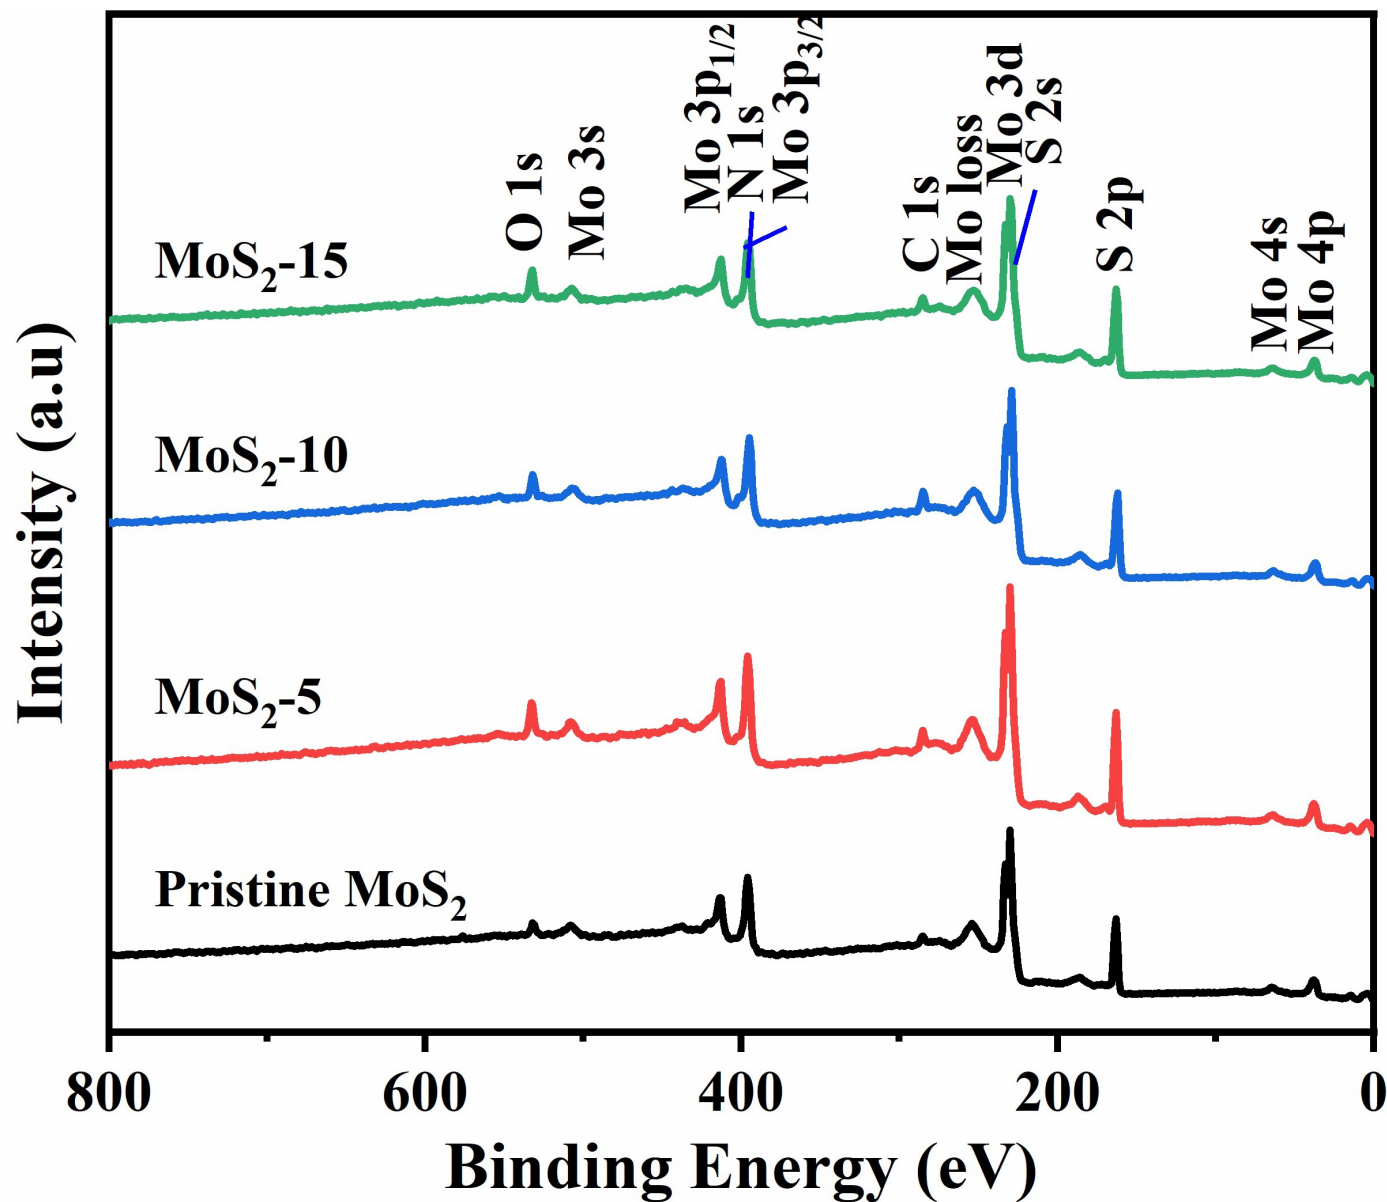

Supplement: d3dt00289f8.pdf [file d3dt00289f8.pdf]
